# Supplementary material
Source: PubMed Central journal article supplement (PMC2666734)

## Supplemental Tables

**Table 1. Characteristics of apoE-deficient mice with and without C2GlcNAcT-I**

| Diet/period | Genotype                   | n  | Body Weight (g) | White blood cells,<br>× 10 <sup>6</sup> /ml | Monocytes,<br>× 10 <sup>6</sup> /ml | Monocytes, %<br>of the total |
|-------------|----------------------------|----|-----------------|---------------------------------------------|-------------------------------------|------------------------------|
| WD/3 months | C2GlcNAcT-I <sup>-/-</sup> | 24 | 29.3 ± 6.6      | 3.8 ± 1.4                                   | 0.2 ± 0.09                          | 5.7 ± 1.7%                   |
|             | C2GlcNAcT-I <sup>+/+</sup> | 27 | 26.9 ± 5.3      | 2.7 ± 1.2                                   | 0.2 ± 0.09                          | 6.1 ± 2.7%                   |
| CD/6 months | C2GlcNAcT-I <sup>-/-</sup> | 19 | 30.5 ± 6.8      | 8.3 ± 1.5                                   | 0.2 ± 0.06                          | 2.8 ± 0.6%                   |
|             | C2GlcNAcT-I <sup>+/+</sup> | 26 | 27.9 ± 3.6      | 8.7 ± 0.7                                   | 0.3 ± 0.06                          | 3.5 ± 0.8%                   |

Mice were maintained on Western diet for 3 months or on standard chow diet for 6 months. Values are mean ± SEM. n represents the number of animals evaluated in each group. No statistical difference in evaluated parameters was found in mice from matched groups.

**Table 2. Plasma Lipid profiles in apoE<sup>-/-</sup> mice with and without C2GlcNAcT-I**

| Diet/period | Genotype                   | n  | TC, mg/dl | TG,<br>mg/dl | HDL-C,<br>mg/dl | LDL-C,<br>mg/dl | VLDL-C,<br>mg/dl |
|-------------|----------------------------|----|-----------|--------------|-----------------|-----------------|------------------|
| WD/3 months | C2GlcNAcT-I <sup>-/-</sup> | 13 | 668 ± 238 | 63 ± 19      | 111 ± 59        | 405 ± 157       | 13 ± 4           |
|             | C2GlcNAcT-I <sup>+/+</sup> | 13 | 760 ± 131 | 75 ± 27      | 172 ± 47        | 556 ± 99        | 15 ± 5           |
| CD/6 months | C2GlcNAcT-I <sup>-/-</sup> | 13 | 403 ± 125 | 61 ± 26      | 90 ± 40         | 262 ± 64        | 12 ± 5           |
|             | C2GlcNAcT-I <sup>+/+</sup> | 14 | 349 ± 81  | 72 ± 25      | 103 ± 34        | 234 ± 52        | 14 ± 5           |

TC indicates total plasma cholesterol; TG, total plasma triglycerides; HDL-C, HDL-cholesterol; LDL-C, LDL-cholesterol; VLDL-C, VLDL-cholesterol. Mice were fed a western diet for 3 months or a chow diet for 6 months. Values are mean ± SEM. n represents the numbers of animals evaluated in each group. No statistical difference in the levels of serum lipids was found between matched groups.

Figure I

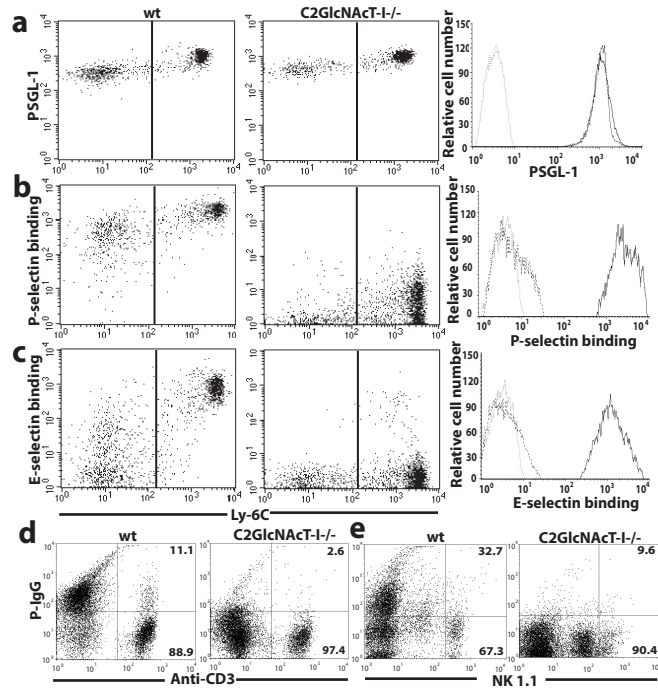

**Figure II**

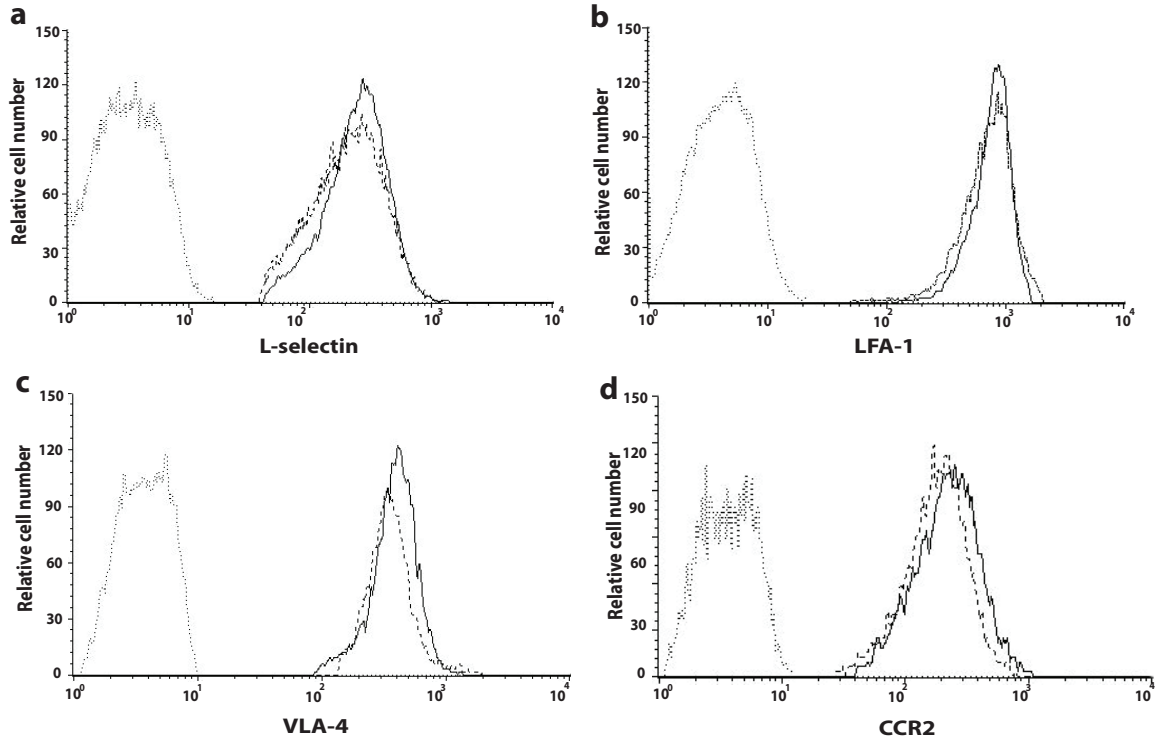

**Figure III**

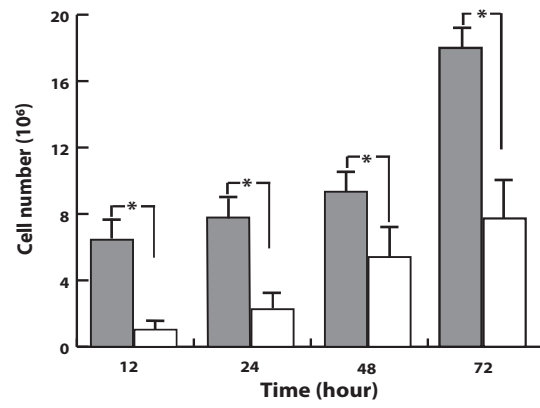

**Figure IV**

Mouse blood Ly6C<sup>hi</sup> monocytes

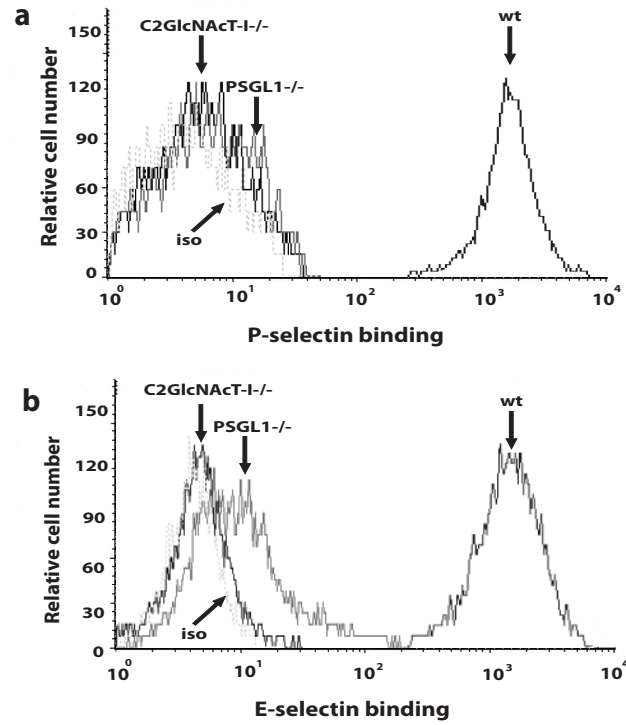

Figure V

Mouse blood Ly6C<sup>hi</sup> monocytes

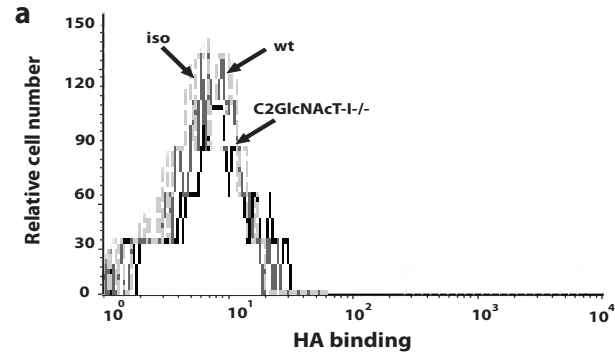

Mouse peritoneal macrophages

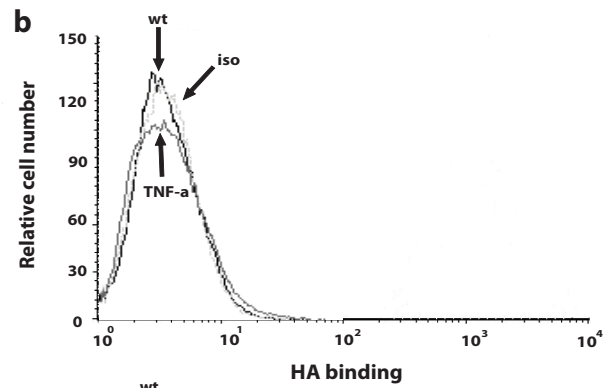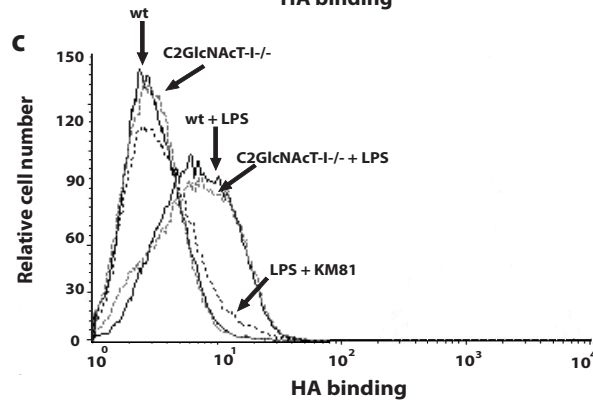

Supplement: NIHMS97965-supplement-supplement_1.pdf [file NIHMS97965-supplement-supplement_1.pdf]
